# Supplementary material
Source: PubMed Central journal article supplement (PMC4319696)

## **Supporting Information**

### **Screening of Nylon-3 Polymers, a New Class of Cationic Amphiphiles for siRNA Delivery**

Venkatareddy Nadithe<sup>a</sup>, Runhui Liu<sup>b,c</sup>, Bryan A. Killinger<sup>a</sup>, Sara Movassaghian<sup>a</sup>, Na Hyung Kim<sup>a</sup>, Anna B. Moszczynska<sup>a</sup>, Kristyn S. Masters<sup>c</sup>, Samuel H Gellman<sup>b</sup>, Olivia M. Merkel<sup>a,d \*</sup>

<sup>a</sup>Department of Pharmaceutical Sciences, Eugene Applebaum College of Pharmacy and Health Sciences, Wayne State University, Detroit, MI 48201

<sup>b</sup>Department of Chemistry, University of Wisconsin, Madison, Wisconsin 53706

<sup>c</sup>Department of Biomedical Engineering, University of Wisconsin, Madison, Wisconsin 53706

<sup>d</sup>Molecular Therapeutics Program, Barbara Ann Karmanos Cancer Institute, Detroit, MI 48201

\* To whom correspondence should be addressed  
Phone: 1-313-577-1523. Fax: 1-313-577-2033. E-mail: [olivia.merkel@wayne.edu](mailto:olivia.merkel@wayne.edu)

|                                | Size (d.nm):         | % Intensity: | St Dev (d.nm): |
|--------------------------------|----------------------|--------------|----------------|
| <b>Z-Average (d.nm):</b> 171.8 | <b>Peak 1:</b> 186.9 | 100.0        | 54.35          |
| <b>Pdl:</b> 0.087              | <b>Peak 2:</b> 0.000 | 0.0          | 0.000          |
| <b>Intercept:</b> 0.943        | <b>Peak 3:</b> 0.000 | 0.0          | 0.000          |

**Result quality : Good**

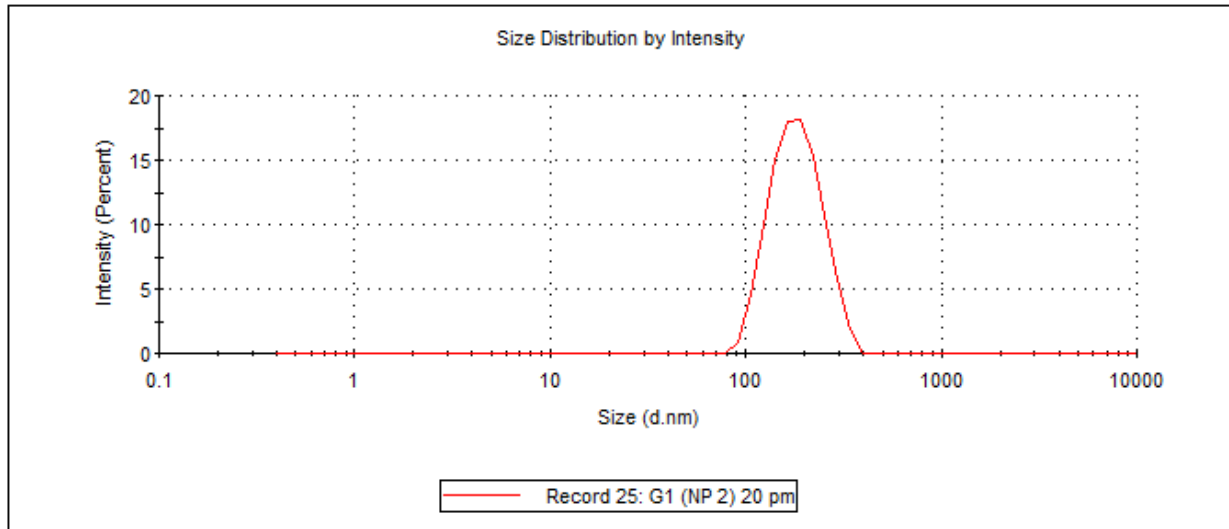

|                                | Size (d.nm):         | % Intensity: | St Dev (d.nm): |
|--------------------------------|----------------------|--------------|----------------|
| <b>Z-Average (d.nm):</b> 299.5 | <b>Peak 1:</b> 327.6 | 100.0        | 110.0          |
| <b>Pdl:</b> 0.118              | <b>Peak 2:</b> 0.000 | 0.0          | 0.000          |
| <b>Intercept:</b> 0.924        | <b>Peak 3:</b> 0.000 | 0.0          | 0.000          |

**Result quality : Good**

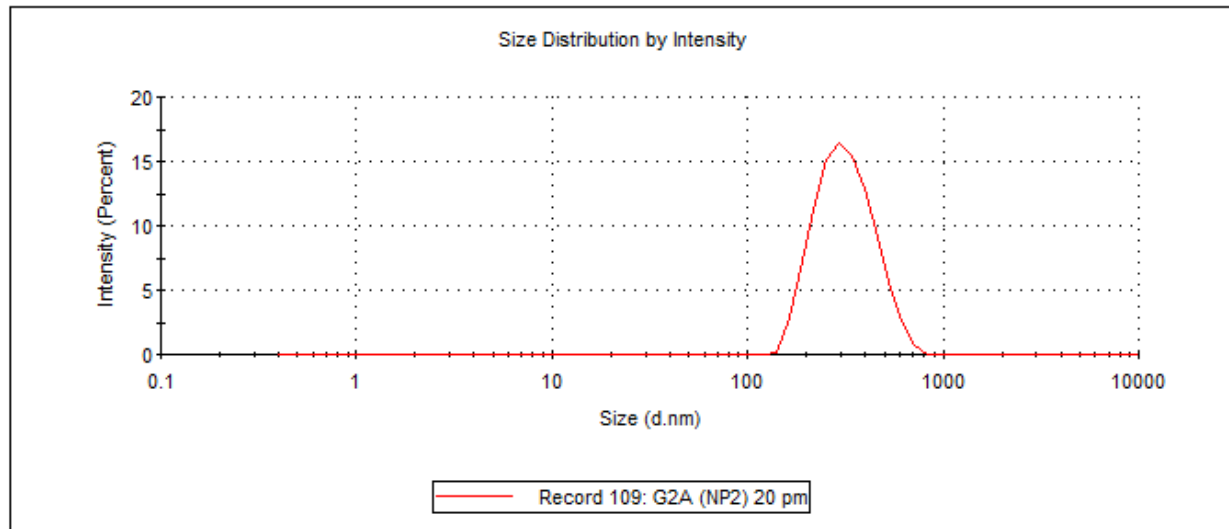

|                                | Size (d.nm):         | % Intensity: | St Dev (d.nm): |
|--------------------------------|----------------------|--------------|----------------|
| <b>Z-Average (d.nm):</b> 171.1 | <b>Peak 1:</b> 194.7 | 97.8         | 86.68          |
| <b>Pdl:</b> 0.199              | <b>Peak 2:</b> 4774  | 2.2          | 736.2          |
| <b>Intercept:</b> 0.926        | <b>Peak 3:</b> 0.000 | 0.0          | 0.000          |

**Result quality : Good**

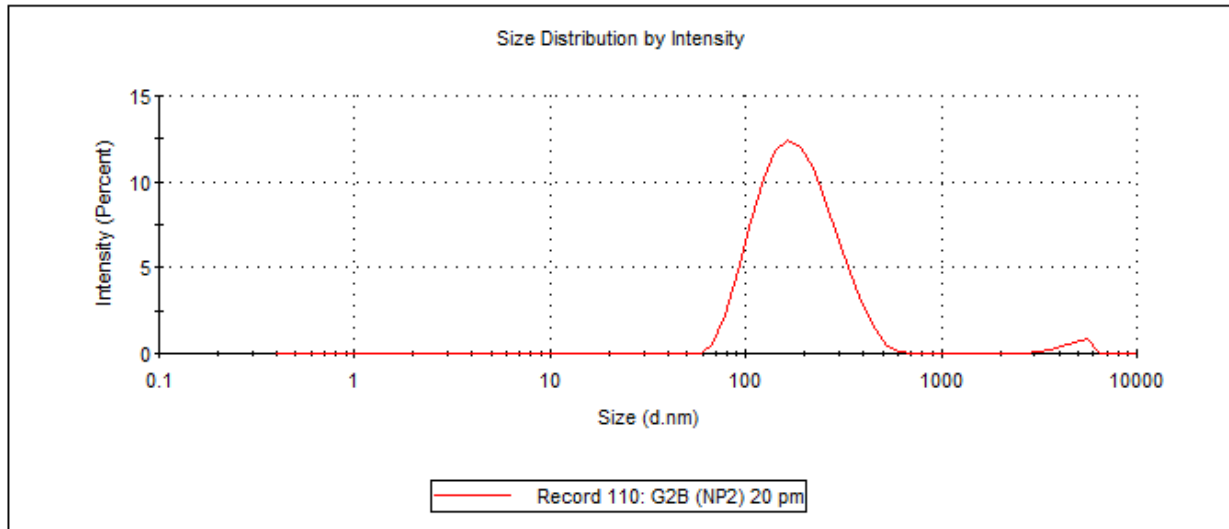

|                                | Size (d.nm):         | % Intensity: | St Dev (d.nm): |
|--------------------------------|----------------------|--------------|----------------|
| <b>Z-Average (d.nm):</b> 136.7 | <b>Peak 1:</b> 170.2 | 97.5         | 73.10          |
| <b>Pdl:</b> 0.199              | <b>Peak 2:</b> 32.66 | 2.5          | 6.194          |
| <b>Intercept:</b> 0.939        | <b>Peak 3:</b> 0.000 | 0.0          | 0.000          |

**Result quality : Good**

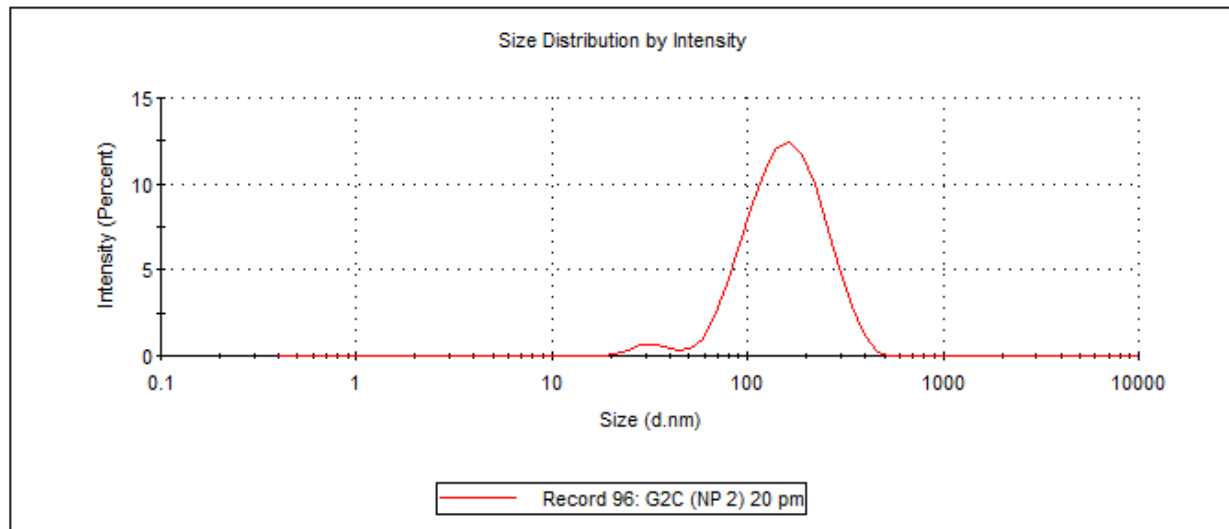

|                                | Size (d.nm):         | % Intensity: | St Dev (d.nm): |
|--------------------------------|----------------------|--------------|----------------|
| <b>Z-Average (d.nm):</b> 142.4 | <b>Peak 1:</b> 176.2 | 100.0        | 88.25          |
| <b>Pdl:</b> 0.195              | <b>Peak 2:</b> 0.000 | 0.0          | 0.000          |
| <b>Intercept:</b> 0.683        | <b>Peak 3:</b> 0.000 | 0.0          | 0.000          |

**Result quality : Good**

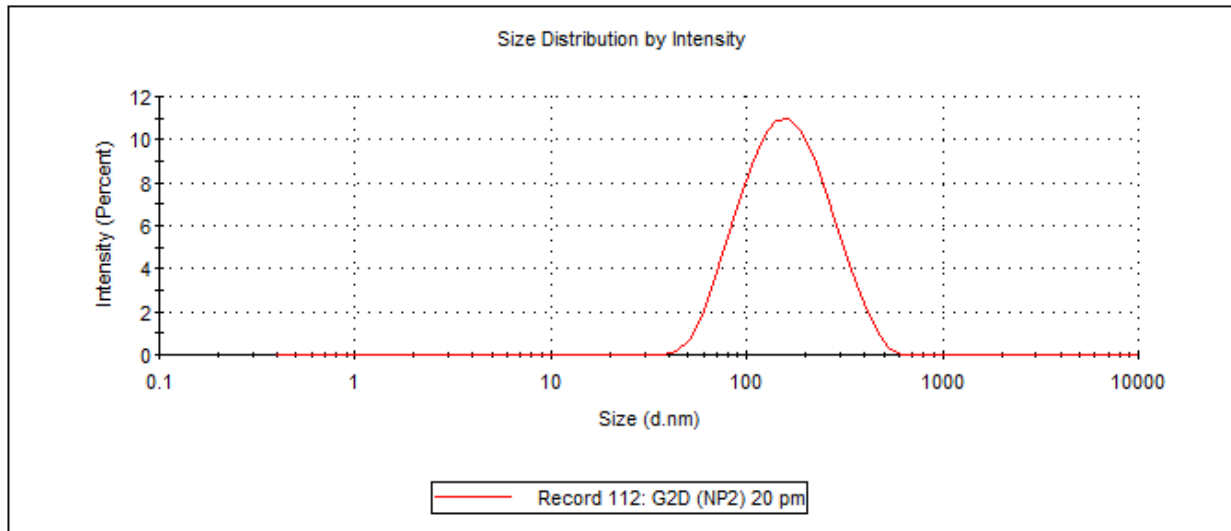

|                                | Size (d.nm):         | % Intensity: | St Dev (d.nm): |
|--------------------------------|----------------------|--------------|----------------|
| <b>Z-Average (d.nm):</b> 128.1 | <b>Peak 1:</b> 157.9 | 97.2         | 86.03          |
| <b>Pdl:</b> 0.242              | <b>Peak 2:</b> 4446  | 2.8          | 903.2          |
| <b>Intercept:</b> 0.890        | <b>Peak 3:</b> 0.000 | 0.0          | 0.000          |

**Result quality : Good**

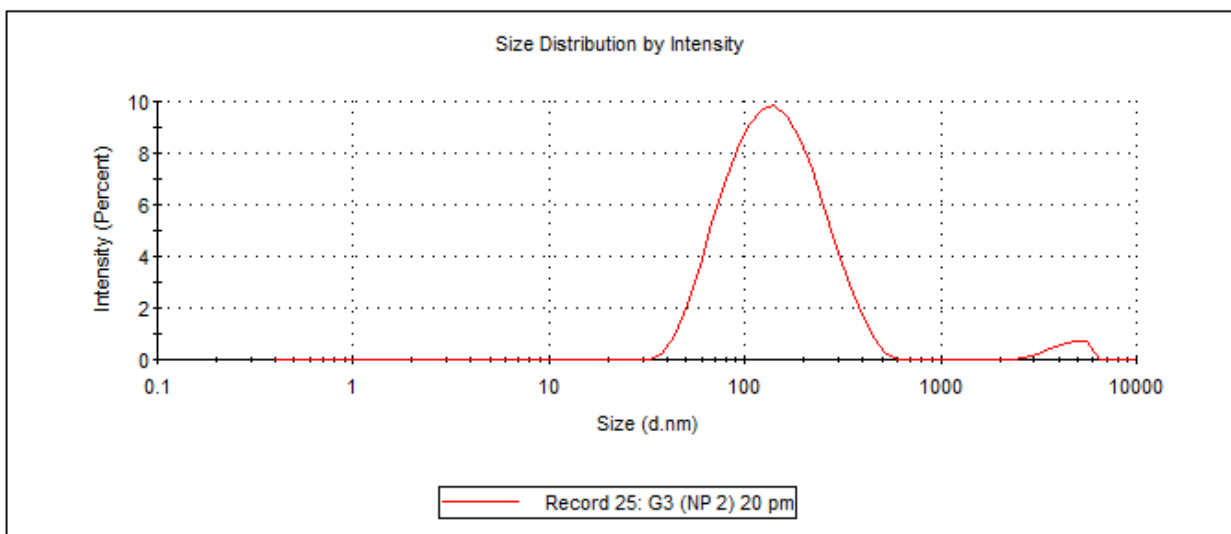

Supplement: mp5004724_si_001.pdf [file mp5004724_si_001.pdf]
